# Supplementary material for: Facile, rapid and upscaled synthesis of green luminescent functional graphene quantum dots for bioimaging
Source: Royal Society of Chemistry journal article supplement (doi:10.1039/c4ra01735h), 2014-01-01
Supplement: c4ra01735h1.pdf [file c4ra01735h1.pdf]

## **Electronic supplementary information (ESI\*)**

### **Facile, rapid and upscaled synthesis of green luminescent functional graphene quantum dots for bioimaging**

Vinod Kumar,<sup>1</sup> Vimal Singh,<sup>1</sup> Sima Umrao,<sup>2</sup> Vyom Parashar,<sup>3</sup> Shiju Abraham,<sup>2</sup> Anand K. Singh,<sup>1</sup> Gopal Nath,<sup>4</sup> Preeti S. Saxena,<sup>1\*</sup> Anchal Srivastava<sup>2\*</sup>

1. Department of Zoology, Banaras Hindu University, Varanasi-22005, India
2. Department of Physics, Banaras Hindu University, Varanasi-221005, India
3. Department of Applied Chemistry, University of Johannesburg, Johannesburg, South Africa
4. Department of Microbiology, Institute of Medical Science, Banaras Hindu University, Varanasi-221005, India

**Table 1.**

**(a) PL in acidic condition**

| $\lambda_{ex}$ (nm) | $\lambda_{em}$ (nm) |     |     |     |
|---------------------|---------------------|-----|-----|-----|
| 300                 | -                   | -   | -   | -   |
| 325                 | 412                 | 437 | 486 | 524 |
| 350                 | 413                 |     | 487 | 521 |
| 375                 | 438                 |     | 485 | 524 |
| 400                 | 438                 |     | 490 | 525 |
| 425                 |                     |     | 496 | 526 |

**(b) PL in basic condition**

| $\lambda_{ex}$ (nm) | $\lambda_{em}$ (nm) |       |
|---------------------|---------------------|-------|
| 300                 |                     | 495 - |
| 325                 | 402                 | 496   |
| 350                 |                     | 521   |
| 375                 |                     | 524   |
| 400                 |                     | 525   |
| 425                 |                     | 526   |

**(c) PL in neutral condition**

| $\lambda_{ex}$ (nm) | $\lambda_{em}$ (nm) |     |
|---------------------|---------------------|-----|
| 300                 | -                   | -   |
| 325                 | 442                 | 485 |
| 350                 | 444                 | 483 |
| 375                 | 446                 | 486 |
| 400                 | 437                 | 500 |
| 425                 |                     | 514 |
